# Supplementary material for: Enhanced adsorption capacity of ultralong hydrogen titanate nanobelts for antibiotics
Source: Royal Society of Chemistry journal article supplement (doi:10.1039/c6ta09116d), 2016-11-22
Supplement: c6ta09116d1.pdf [file c6ta09116d1.pdf]

## **Enhanced adsorption capacity of ultralong hydrogen titanate nanobelts for antibiotics**

Wenyao Li,<sup>a,e</sup> Jingru Wang,<sup>a</sup> Guanjie He,<sup>b</sup> Li Yu,<sup>c</sup> Nuruzzaman Noor,<sup>d</sup> Yangang Sun,<sup>a</sup> Xiyang Zhou,<sup>\*a</sup> Junqing Hu<sup>\*e</sup> and Ivan P. Parkin<sup>\*b</sup>

<sup>a</sup> *School of material engineering, Shanghai university of engineering science, Shanghai 201620, China.*

<sup>b</sup> *Materials Chemistry Centre, Department of Chemistry, University College London, 20 Gordon Street, London WC1H 0AJ, U. K.*

<sup>c</sup> *Shenzhen Key Laboratory of Laser Engineering, Key Laboratory of Optoelectronic Devices and Systems of Ministry of Education and Guangdong Province, College of Optoelectronic Engineering, Shenzhen University, Shenzhen 518060, China*

<sup>d</sup> *Institute of Textiles and Clothing Q Core, 7/F The Hong Kong Polytechnic University Hunghom, Kowloon, Hong Kong*

<sup>e</sup> *State Key Laboratory for Modification of Chemical Fibers and Polymer Materials, College of Materials Science and Engineering, Donghua University, Shanghai 201620, China.*

E-mail: zhouxiyang@sues.edu.cn; hu.junqing@dhu.edu.cn; i.p.parkin@ucl.ac.uk

**Raw materials:** Titanium tetrachloride (TiCl<sub>4</sub>, Sinopharm Chemical Reagent Co., Ltd.), Sodium hydroxide (NaOH, Ourchem), Nitric acid (HNO<sub>3</sub>, Ourchem), deionized water. Tetracycline (TC, Macklin), norfloxacin (NFO, Aladdin) and ofloxacin (OFO, Aladdin) were selected as the representative of pharmaceuticals pollutions for adsorption experiments, which were both analytical grade (purity>98%). Stock solution of TC, OFO and NFO were prepared with deionized water and stored in the dark at 4 °C.

The chemical structure of TC, NFO and OFO are as follow:

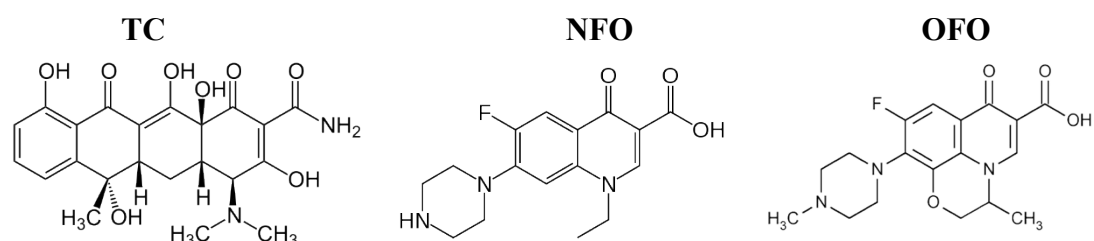

**Tab. S1** Binding Energy and Relative Content of O in UHTNs after adsorption

| Valence state | sample        | Proposed components | Binding energy (eV) | Relative content (%) |
|---------------|---------------|---------------------|---------------------|----------------------|
| O 1s          | TC-load UHTNs | Ti-O                | 529.9               | 58.33                |
|               |               | C-O                 | 530.5               | 26.1                 |
|               |               | H-O                 | 531.6               | 15.57                |

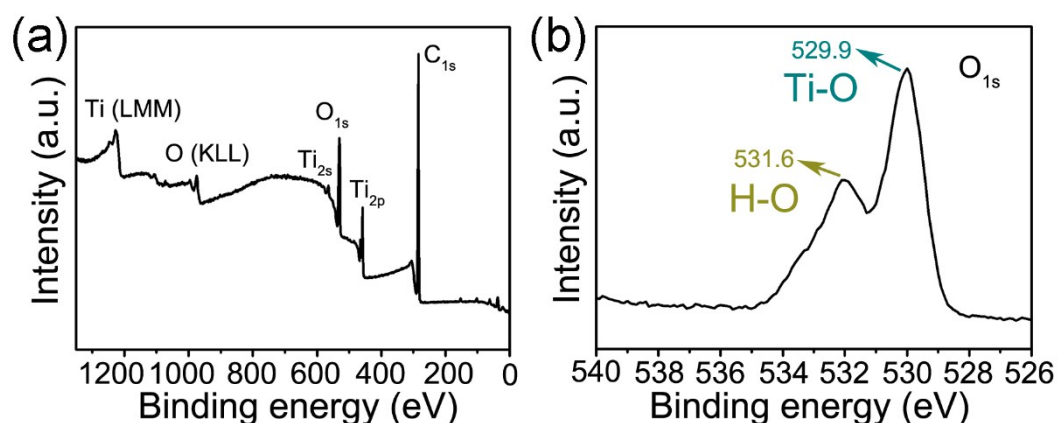

**Fig. S1** (a) XPS wide-scan spectrum and (b) high resolution XPS spectra of O 1s of UHTNs.
